# Supplementary material
Source: publisher site journal article supplement (https://www.dovepress.com/article/supplementary_file/538889/Supplementary%20Materials_1.docx)

**Supplementary Figure 1**: Calibration plot of predictive models for ICAS progression.

Supplementary Figure 1.


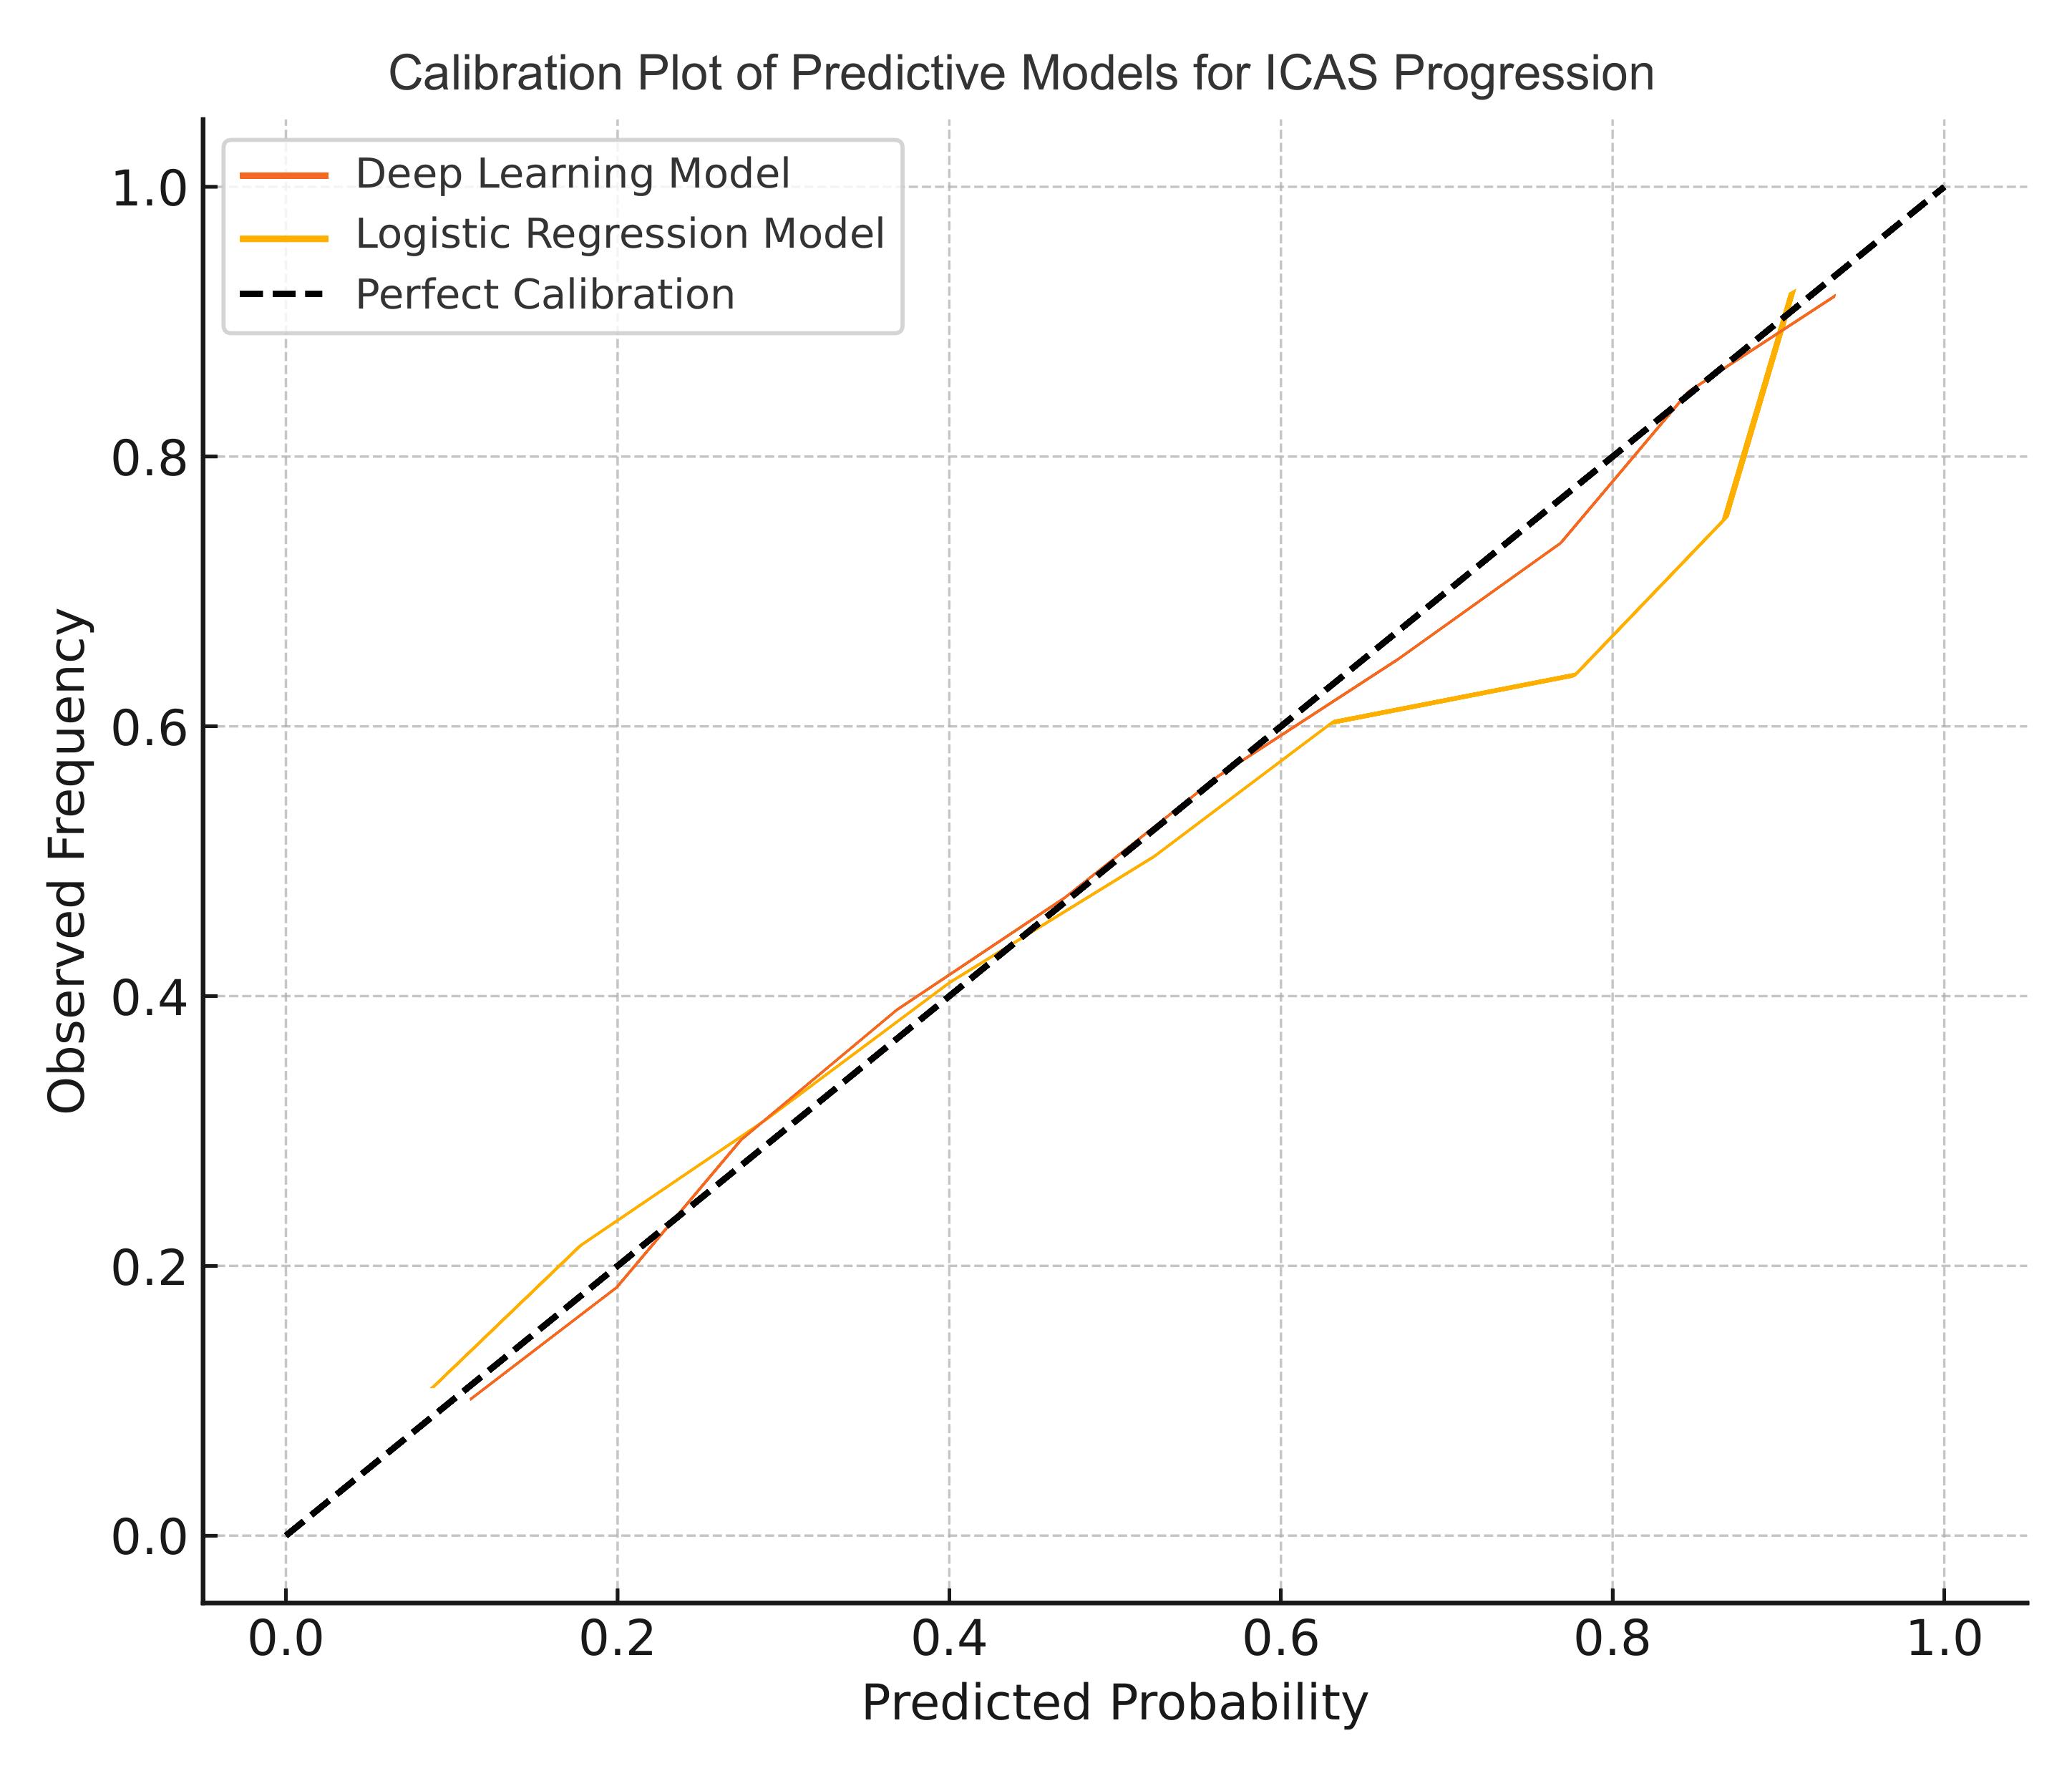

Supplement: Supplementary file 1 [file Supplementary%20Materials_1.docx]
